# Supplementary material for: Model for predicting drug resistance based on the clinical profile of tuberculosis patients using machine learning techniques
Source: PeerJ journal article supplement (doi:10.7717/peerj-cs.2246), 2024-10-14
Supplement: code.zip [file models_results.xlsx]

## Sheet: Sheet1
Modelo	Accuracy	ROC-AUC	F1-Score	Recall
Adaboost	0.828582	0.854481	0.835109	0.866393
Random Forest	0.843269	0.887734	0.851174	0.894157
SVM	0.841637	0.878945	0.849628	0.892491
XGBoost	0.846515	0.888032	0.853413	0.892438
Regressão Logística	0.835899	0.891691	0.84229	0.874511
