# Supplementary material for: Model for predicting drug resistance based on the clinical profile of tuberculosis patients using machine learning techniques
Source: PeerJ journal article supplement (doi:10.7717/peerj-cs.2246), 2024-10-14
Supplement: code.zip [file Tuberculosis_chi2_and_plot_1.pdf › code/EDA/chi2/Tuberculosis_chi2_and_plot_1.pdf]

# Resultados

## Tabelas de Contingência

Tabelas de Contingência

| testesensibilidade |            | Status_Resistencia |        | Total   |
|--------------------|------------|--------------------|--------|---------|
|                    |            | 0                  | 1      |         |
| N                  | Observado  | 1467               | 686    | 2153    |
|                    | % em linha | 68.1 %             | 31.9 % | 100.0 % |
| S                  | Observado  | 54                 | 1847   | 1901    |
|                    | % em linha | 2.8 %              | 97.2 % | 100.0 % |
| Total              | Observado  | 1521               | 2533   | 4054    |
|                    | % em linha | 37.5 %             | 62.5 % | 100.0 % |

Testes  $\chi^2$

|          | Valor | gl | p      |
|----------|-------|----|--------|
| $\chi^2$ | 1836  | 1  | < .001 |
| N        | 4054  |    |        |

## Survey Plots

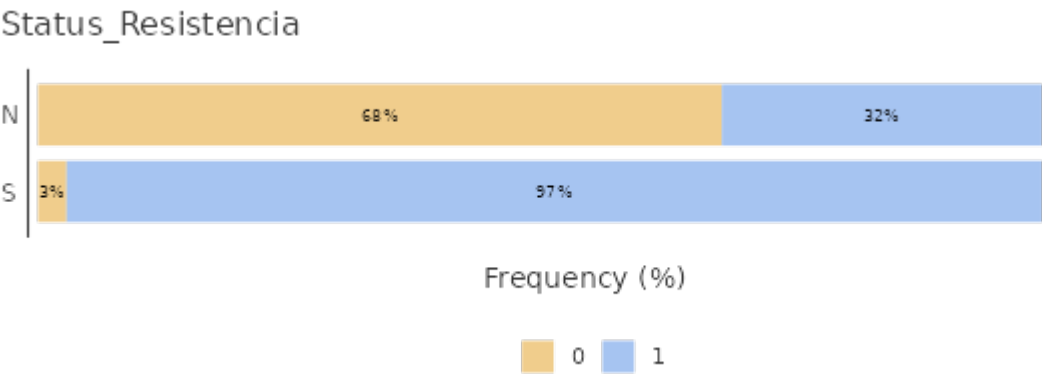

## Tabelas de Contingência

Tabelas de Contingência

| cultEsc  |            | Status_Resistencia |        | Total   |
|----------|------------|--------------------|--------|---------|
|          |            | 0                  | 1      |         |
| And      | Observado  | 127                | 54     | 181     |
|          | % em linha | 70.2 %             | 29.8 % | 100.0 % |
| N/realiz | Observado  | 7773               | 2095   | 9868    |
|          | % em linha | 78.8 %             | 21.2 % | 100.0 % |
| Neg      | Observado  | 2041               | 896    | 2937    |
|          | % em linha | 69.5 %             | 30.5 % | 100.0 % |
| Pos      | Observado  | 2251               | 9930   | 12181   |
|          | % em linha | 18.5 %             | 81.5 % | 100.0 % |
| Total    | Observado  | 12192              | 12975  | 25167   |
|          | % em linha | 48.4 %             | 51.6 % | 100.0 % |

Testes  $\chi^2$

|          | Valor | gl | p      |
|----------|-------|----|--------|
| $\chi^2$ | 8568  | 3  | < .001 |
| N        | 25167 |    |        |

Survey Plots

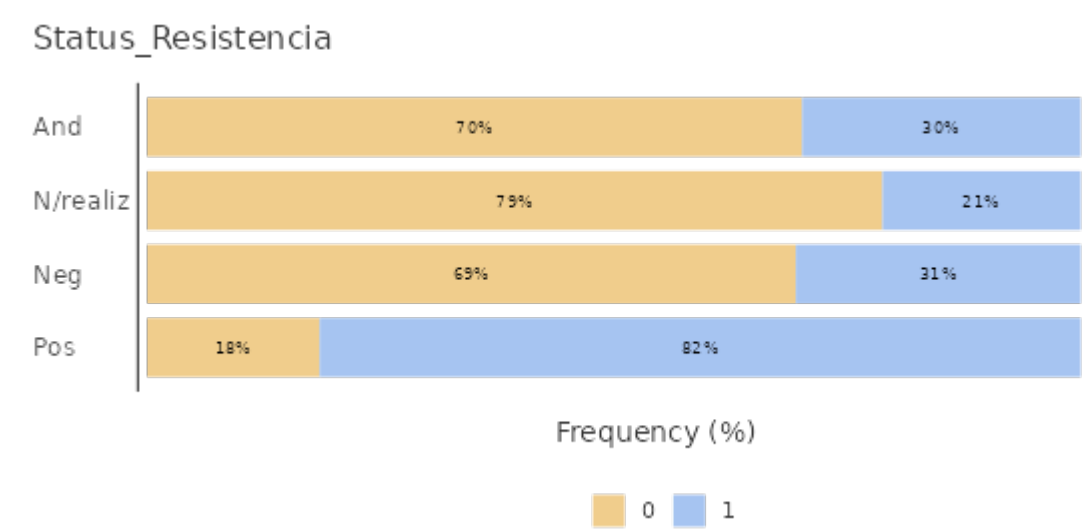

Tabelas de Contingência

Tabelas de Contingência

| CULTOUTRO |            | Status_Resistencia |        | Total   |
|-----------|------------|--------------------|--------|---------|
|           |            | 0                  | 1      |         |
| And       | Observado  | 36                 | 17     | 53      |
|           | % em linha | 67.9 %             | 32.1 % | 100.0 % |
| N/realiz  | Observado  | 9788               | 9547   | 19335   |
|           | % em linha | 50.6 %             | 49.4 % | 100.0 % |
| Neg       | Observado  | 476                | 292    | 768     |
|           | % em linha | 62.0 %             | 38.0 % | 100.0 % |
| Pos       | Observado  | 298                | 1068   | 1366    |
|           | % em linha | 21.8 %             | 78.2 % | 100.0 % |
| Total     | Observado  | 10598              | 10924  | 21522   |
|           | % em linha | 49.2 %             | 50.8 % | 100.0 % |

Testes  $\chi^2$

|          | Valor | gl | p      |
|----------|-------|----|--------|
| $\chi^2$ | 483   | 3  | < .001 |
| N        | 21522 |    |        |

Survey Plots

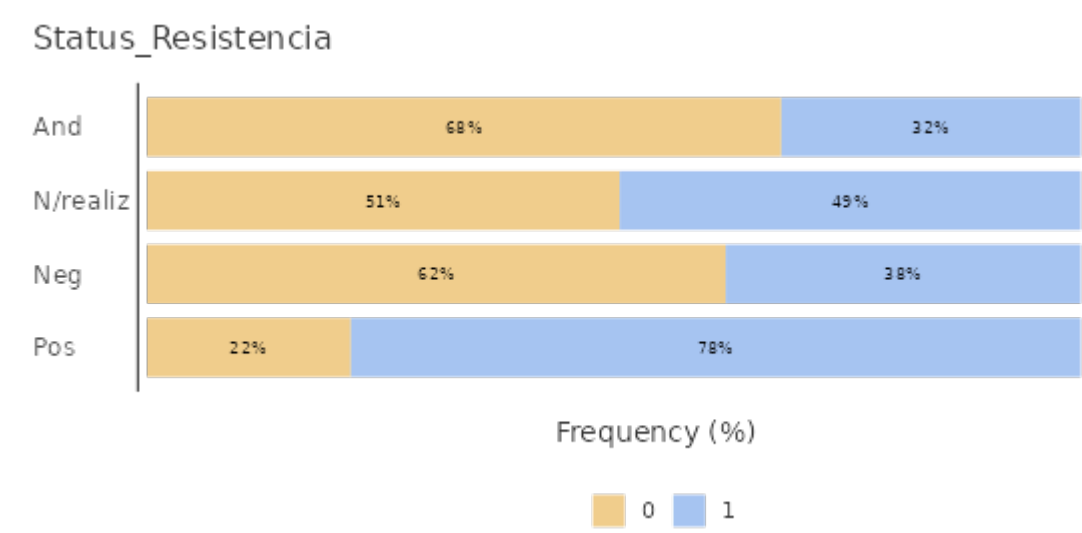

Tabelas de Contingência

## Tabelas de Contingência

| mtvInter1                        |            | Status_Resistencia |        | Total   |
|----------------------------------|------------|--------------------|--------|---------|
|                                  |            | 0                  | 1      |         |
| Abscesso                         | Observado  | 12                 | 22     | 34      |
|                                  | % em linha | 35.3 %             | 64.7 % | 100.0 % |
| Aids                             | Observado  | 78                 | 257    | 335     |
|                                  | % em linha | 23.3 %             | 76.7 % | 100.0 % |
| Caquexia                         | Observado  | 80                 | 147    | 227     |
|                                  | % em linha | 35.2 %             | 64.8 % | 100.0 % |
| Causas Sociais                   | Observado  | 149                | 522    | 671     |
|                                  | % em linha | 22.2 %             | 77.8 % | 100.0 % |
| Diabetes                         | Observado  | 10                 | 17     | 27      |
|                                  | % em linha | 37.0 %             | 63.0 % | 100.0 % |
| Elucidacao Diagnostica           | Observado  | 1252               | 1747   | 2999    |
|                                  | % em linha | 41.7 %             | 58.3 % | 100.0 % |
| Hemoptise                        | Observado  | 132                | 146    | 278     |
|                                  | % em linha | 47.5 %             | 52.5 % | 100.0 % |
| Insuficiencia Respiratoria Aguda | Observado  | 641                | 817    | 1458    |
|                                  | % em linha | 44.0 %             | 56.0 % | 100.0 % |
| Intolerancia Medicamentosa       | Observado  | 18                 | 36     | 54      |
|                                  | % em linha | 33.3 %             | 66.7 % | 100.0 % |
| Meningite                        | Observado  | 24                 | 22     | 46      |
|                                  | % em linha | 52.2 %             | 47.8 % | 100.0 % |
| Nao Adesao ao Tratamento         | Observado  | 32                 | 75     | 107     |
|                                  | % em linha | 29.9 %             | 70.1 % | 100.0 % |
| Outros                           | Observado  | 442                | 528    | 970     |
|                                  | % em linha | 45.6 %             | 54.4 % | 100.0 % |
| TB Miliar                        | Observado  | 14                 | 20     | 34      |
|                                  | % em linha | 41.2 %             | 58.8 % | 100.0 % |
| Total                            | Observado  | 2884               | 4356   | 7240    |
|                                  | % em linha | 39.8 %             | 60.2 % | 100.0 % |

Testes  $\chi^2$ 

|          | Valor | gl | p      |
|----------|-------|----|--------|
| $\chi^2$ | 171   | 12 | < .001 |
| N        | 7240  |    |        |

## Survey Plots

## Status\_Resistencia

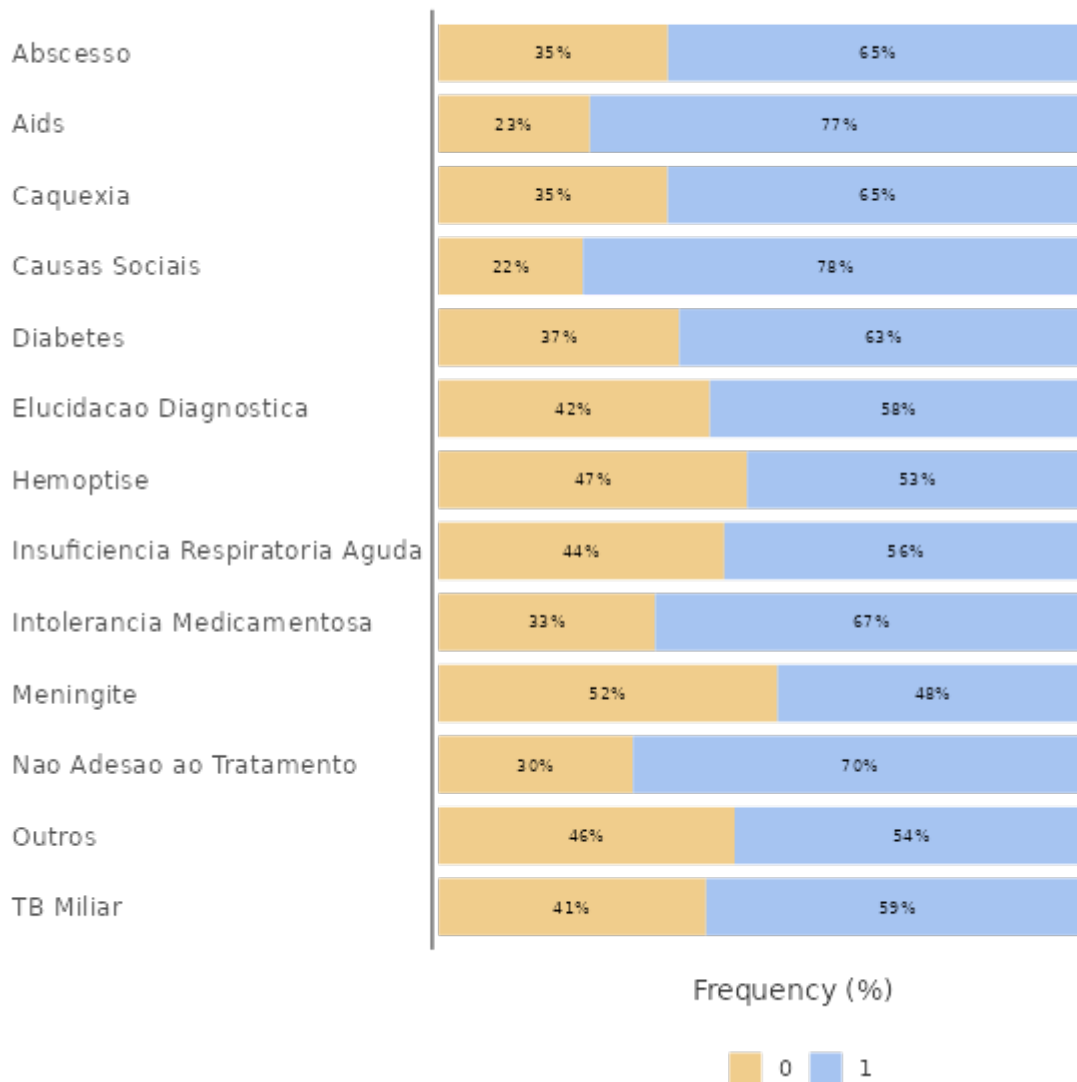

## Tabelas de Contingência

Tabelas de Contingência

|       |            | Status_Resistencia |        | Total   |
|-------|------------|--------------------|--------|---------|
| aids  |            | 0                  | 1      |         |
| N     | Observado  | 12394              | 11279  | 23673   |
|       | % em linha | 52.4 %             | 47.6 % | 100.0 % |
| S     | Observado  | 913                | 2028   | 2941    |
|       | % em linha | 31.0 %             | 69.0 % | 100.0 % |
| Total | Observado  | 13307              | 13307  | 26614   |
|       | % em linha | 50.0 %             | 50.0 % | 100.0 % |

Testes  $\chi^2$

|          | Valor | gl | p      |
|----------|-------|----|--------|
| $\chi^2$ | 475   | 1  | < .001 |
| N        | 26614 |    |        |

Survey Plots

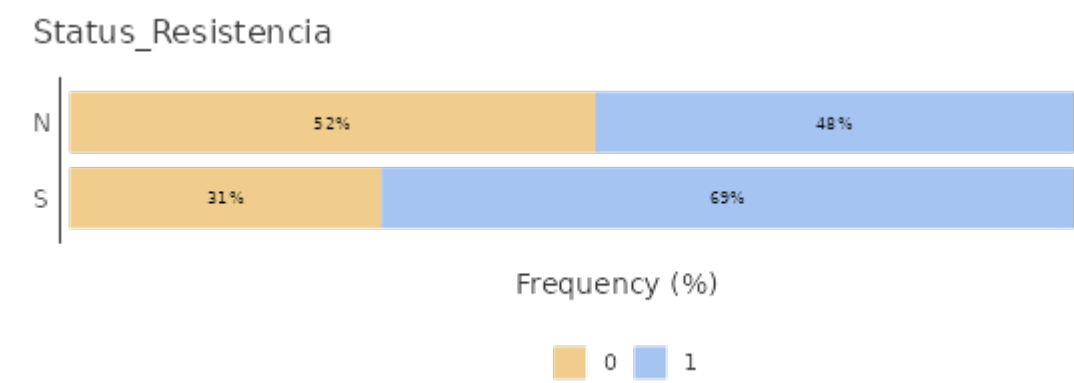

Tabelas de Contingência

Tabelas de Contingência

| DROGADICAO |            | Status_Resistencia |        | Total   |
|------------|------------|--------------------|--------|---------|
|            |            | 0                  | 1      |         |
| N          | Observado  | 12099              | 10537  | 22636   |
|            | % em linha | 53.5 %             | 46.5 % | 100.0 % |
| S          | Observado  | 1208               | 2770   | 3978    |
|            | % em linha | 30.4 %             | 69.6 % | 100.0 % |
| Total      | Observado  | 13307              | 13307  | 26614   |
|            | % em linha | 50.0 %             | 50.0 % | 100.0 % |

Testes  $\chi^2$

|          | Valor | gl | p      |
|----------|-------|----|--------|
| $\chi^2$ | 721   | 1  | < .001 |
| N        | 26614 |    |        |

Survey Plots

Status\_Resistencia

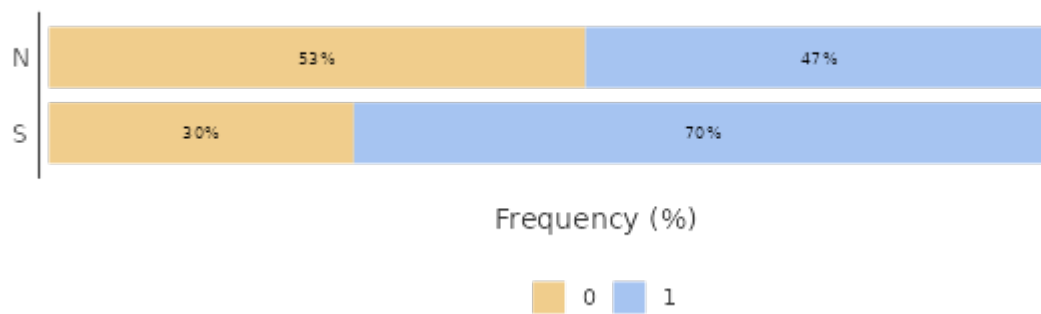

## Tabelas de Contingência

Tabelas de Contingência

|        |            | Status_Resistencia |         | Total   |
|--------|------------|--------------------|---------|---------|
|        |            | 0                  | 1       |         |
| MR     | Observado  | 0                  | 19      | 19      |
|        | % em linha | 0.0 %              | 100.0 % | 100.0 % |
| OUTROS | Observado  | 288                | 493     | 781     |
|        | % em linha | 36.9 %             | 63.1 %  | 100.0 % |
| RHZ    | Observado  | 1283               | 516     | 1799    |
|        | % em linha | 71.3 %             | 28.7 %  | 100.0 % |
| RHZE   | Observado  | 11727              | 12278   | 24005   |
|        | % em linha | 48.9 %             | 51.1 %  | 100.0 % |
| Total  | Observado  | 13298              | 13306   | 26604   |
|        | % em linha | 50.0 %             | 50.0 %  | 100.0 % |

Testes  $\chi^2$

|          | Valor | gl | p      |
|----------|-------|----|--------|
| $\chi^2$ | 412   | 3  | < .001 |
| N        | 26604 |    |        |

## Survey Plots

## Status\_Resistencia

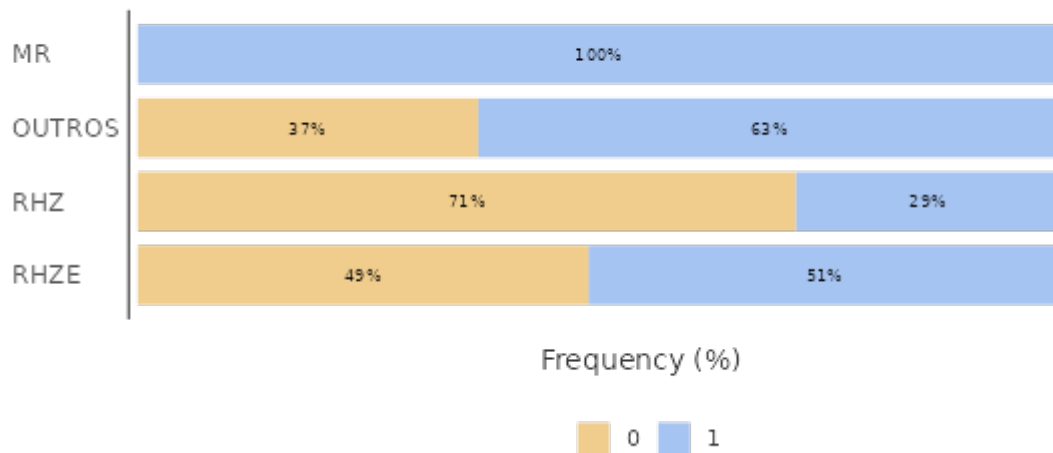

^ MR possui poucas amostras.

## Tabelas de Contingência

Tabelas de Contingência

| tipoCaso                         |            | Status_Resistencia |         | Total   |
|----------------------------------|------------|--------------------|---------|---------|
|                                  |            | 0                  | 1       |         |
| Novo                             | Observado  | 12780              | 12124   | 24904   |
|                                  | % em linha | 51.3 %             | 48.7 %  | 100.0 % |
| Recidiva                         | Observado  | 317                | 576     | 893     |
|                                  | % em linha | 35.5 %             | 64.5 %  | 100.0 % |
| Retr Aband                       | Observado  | 209                | 482     | 691     |
|                                  | % em linha | 30.2 %             | 69.8 %  | 100.0 % |
| Retrat apos falencia/resistencia | Observado  | 1                  | 124     | 125     |
|                                  | % em linha | 0.8 %              | 99.2 %  | 100.0 % |
| Retrat apos mud esquema int/tox  | Observado  | 0                  | 1       | 1       |
|                                  | % em linha | 0.0 %              | 100.0 % | 100.0 % |
| Total                            | Observado  | 13307              | 13307   | 26614   |
|                                  | % em linha | 50.0 %             | 50.0 %  | 100.0 % |

Testes  $\chi^2$

|                       | Valor | gl | p                   |
|-----------------------|-------|----|---------------------|
| $\chi^2$              | 322   | 4  | < .001              |
| Teste Exato de Fisher |       |    | < .001 <sup>a</sup> |
| N                     | 26614 |    |                     |

<sup>a</sup> Monte Carlo simulation

## Survey Plots



## Status\_Resistencia

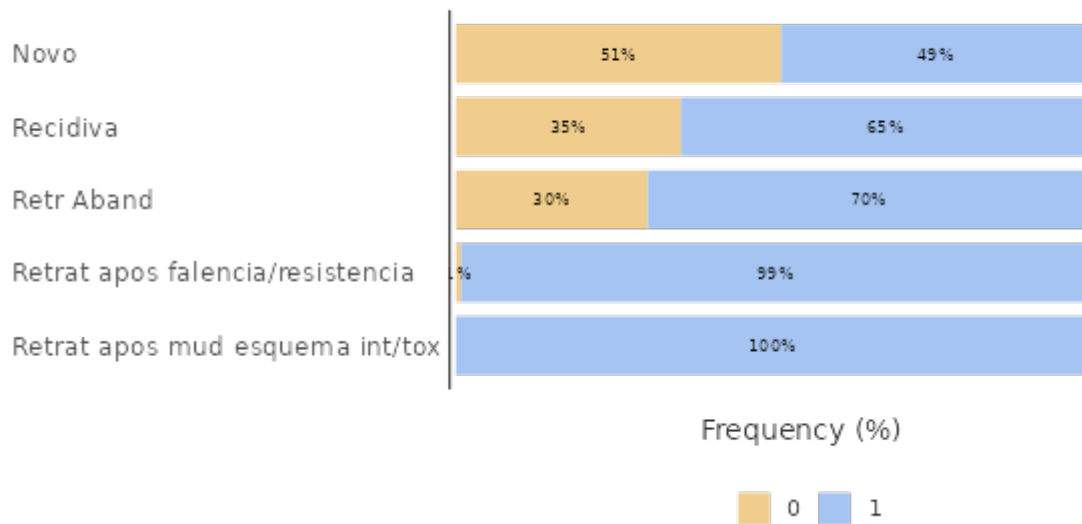

## Tabelas de Contingência

Tabelas de Contingência

|            |            | Status_Resistencia |        | Total   |
|------------|------------|--------------------|--------|---------|
| idade      |            | 0                  | 1      |         |
| 0-22       | Observado  | 3441               | 2740   | 6181    |
|            | % em linha | 55.7 %             | 44.3 % | 100.0 % |
| 23-39      | Observado  | 3294               | 3816   | 7110    |
|            | % em linha | 46.3 %             | 53.7 % | 100.0 % |
| 40-54      | Observado  | 3255               | 3692   | 6947    |
|            | % em linha | 46.9 %             | 53.1 % | 100.0 % |
| Mais de 54 | Observado  | 3317               | 3059   | 6376    |
|            | % em linha | 52.0 %             | 48.0 % | 100.0 % |
| Total      | Observado  | 13307              | 13307  | 26614   |
|            | % em linha | 50.0 %             | 50.0 % | 100.0 % |

Testes  $\chi^2$

|          | Valor | gl | p      |
|----------|-------|----|--------|
| $\chi^2$ | 156   | 3  | < .001 |
| N        | 26614 |    |        |

## Survey Plots

## Status\_Resistencia

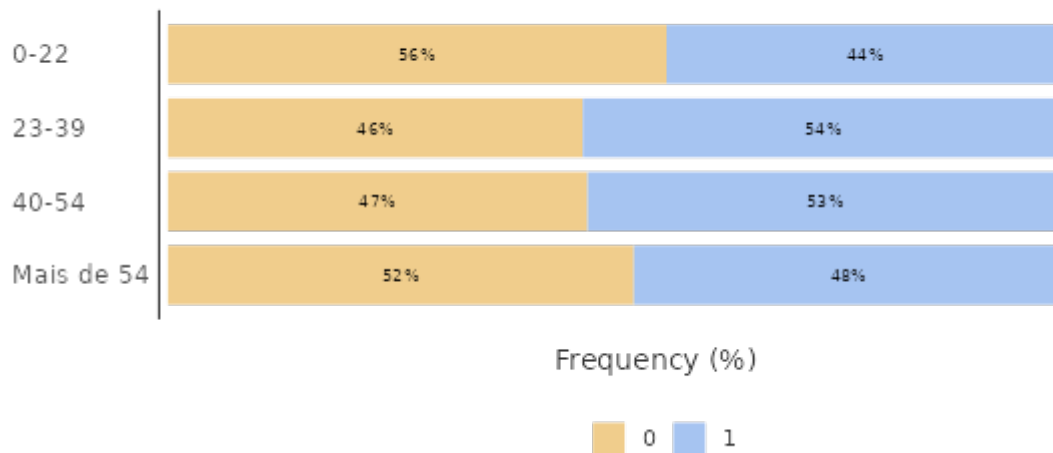

## Tabelas de Contingência

Tabelas de Contingência

|          |            | Status_Resistencia |        | Total   |
|----------|------------|--------------------|--------|---------|
|          |            | 0                  | 1      |         |
| Abandono | Observado  | 1426               | 2127   | 3553    |
|          | % em linha | 40.1 %             | 59.9 % | 100.0 % |
| Cura     | Observado  | 11881              | 11180  | 23061   |
|          | % em linha | 51.5 %             | 48.5 % | 100.0 % |
| Total    | Observado  | 13307              | 13307  | 26614   |
|          | % em linha | 50.0 %             | 50.0 % | 100.0 % |

Testes  $\chi^2$

|          | Valor | gl | p      |
|----------|-------|----|--------|
| $\chi^2$ | 160   | 1  | < .001 |
| N        | 26614 |    |        |

## Survey Plots

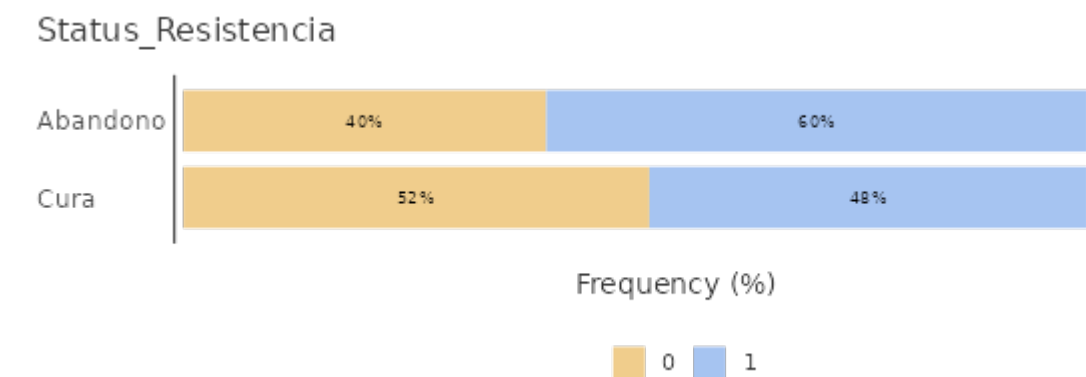

## Tabelas de Contingência

Tabelas de Contingência

| TIPOCUP               |            | Status_Resistencia |        | Total   |
|-----------------------|------------|--------------------|--------|---------|
|                       |            | 0                  | 1      |         |
| Aposentado            | Observado  | 849                | 712    | 1561    |
|                       | % em linha | 54.4 %             | 45.6 % | 100.0 % |
| Desempregado          | Observado  | 1637               | 2581   | 4218    |
|                       | % em linha | 38.8 %             | 61.2 % | 100.0 % |
| Dona de Casa          | Observado  | 1128               | 896    | 2024    |
|                       | % em linha | 55.7 %             | 44.3 % | 100.0 % |
| Outra                 | Observado  | 7987               | 7377   | 15364   |
|                       | % em linha | 52.0 %             | 48.0 % | 100.0 % |
| Profissional de Saude | Observado  | 178                | 244    | 422     |
|                       | % em linha | 42.2 %             | 57.8 % | 100.0 % |
| Total                 | Observado  | 11779              | 11810  | 23589   |
|                       | % em linha | 49.9 %             | 50.1 % | 100.0 % |

Testes  $\chi^2$

|          | Valor | gl | p      |
|----------|-------|----|--------|
| $\chi^2$ | 284   | 4  | < .001 |
| N        | 23589 |    |        |

## Survey Plots

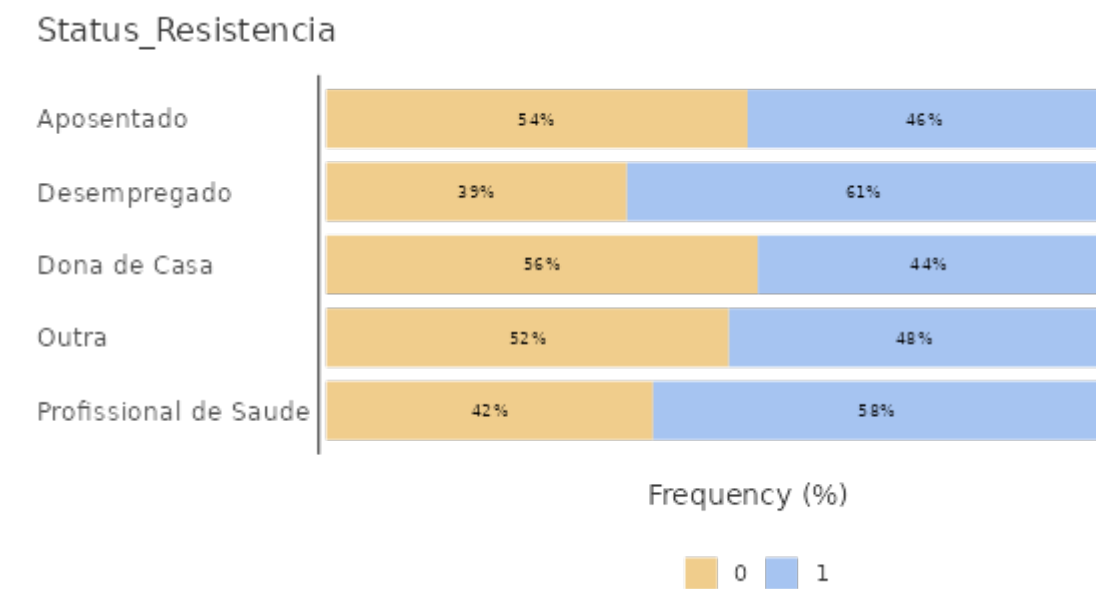

## Tabelas de Contingência

Tabelas de Contingência

|           |            | Status_Resistencia |        |         |
|-----------|------------|--------------------|--------|---------|
| TABAGISMO |            | 0                  | 1      | Total   |
| N         | Observado  | 12238              | 11324  | 23562   |
|           | % em linha | 51.9 %             | 48.1 % | 100.0 % |
| S         | Observado  | 1069               | 1983   | 3052    |
|           | % em linha | 35.0 %             | 65.0 % | 100.0 % |
| Total     | Observado  | 13307              | 13307  | 26614   |
|           | % em linha | 50.0 %             | 50.0 % | 100.0 % |

Testes  $\chi^2$

|          | Valor | gl | p      |
|----------|-------|----|--------|
| $\chi^2$ | 309   | 1  | < .001 |
| N        | 26614 |    |        |

## Survey Plots

## Status\_Resistencia

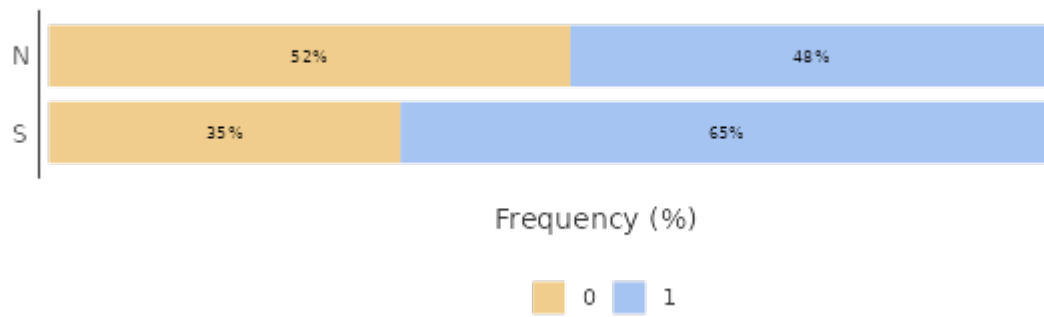

## Referências

**[1]** The jamovi project (2022). *jamovi*. (Version 2.3) [Computer Software]. Retrieved from <https://www.jamovi.org>.

**[2]** R Core Team (2021). *R: A Language and environment for statistical computing*. (Version 4.1) [Computer software]. Retrieved from <https://cran.r-project.org>. (R packages retrieved from MRAN snapshot 2022-01-01).
