# Supplementary material for: Model for predicting drug resistance based on the clinical profile of tuberculosis patients using machine learning techniques
Source: PeerJ journal article supplement (doi:10.7717/peerj-cs.2246), 2024-10-14
Supplement: code.zip [file Tuberculosis_chi2_and_plot_2.pdf › code/EDA/chi2/Tuberculosis_chi2_and_plot_2.pdf]

# Resultados

## Tabelas de Contingência

Tabelas de Contingência

| FORMACLIN1            |            | Status_Resistencia |        | Total   |
|-----------------------|------------|--------------------|--------|---------|
|                       |            | 0                  | 1      |         |
| Ganglionar Periferica | Observado  | 486                | 173    | 659     |
|                       | % em linha | 73.7 %             | 26.3 % | 100.0 % |
| Genital               | Observado  | 23                 | 2      | 25      |
|                       | % em linha | 92.0 %             | 8.0 %  | 100.0 % |
| Intestinal            | Observado  | 47                 | 16     | 63      |
|                       | % em linha | 74.6 %             | 25.4 % | 100.0 % |
| Laringea              | Observado  | 10                 | 2      | 12      |
|                       | % em linha | 83.3 %             | 16.7 % | 100.0 % |
| Meningea              | Observado  | 126                | 53     | 179     |
|                       | % em linha | 70.4 %             | 29.6 % | 100.0 % |
| Miliar                | Observado  | 107                | 57     | 164     |
|                       | % em linha | 65.2 %             | 34.8 % | 100.0 % |
| Multiplos Orgaos      | Observado  | 30                 | 40     | 70      |
|                       | % em linha | 42.9 %             | 57.1 % | 100.0 % |
| Oftalmica             | Observado  | 141                | 10     | 151     |
|                       | % em linha | 93.4 %             | 6.6 %  | 100.0 % |
| Ossea                 | Observado  | 108                | 43     | 151     |
|                       | % em linha | 71.5 %             | 28.5 % | 100.0 % |
| Outras                | Observado  | 114                | 35     | 149     |
|                       | % em linha | 76.5 %             | 23.5 % | 100.0 % |
| Pele                  | Observado  | 57                 | 11     | 68      |
|                       | % em linha | 83.8 %             | 16.2 % | 100.0 % |
| Pleural               | Observado  | 1201               | 240    | 1441    |
|                       | % em linha | 83.3 %             | 16.7 % | 100.0 % |
| Pul                   | Observado  | 10804              | 12586  | 23390   |
|                       | % em linha | 46.2 %             | 53.8 % | 100.0 % |
| Vias Urinarias        | Observado  | 53                 | 39     | 92      |
|                       | % em linha | 57.6 %             | 42.4 % | 100.0 % |
| Total                 | Observado  | 13307              | 13307  | 26614   |
|                       | % em linha | 50.0 %             | 50.0 % | 100.0 % |

Testes  $\chi^2$

|          | Valor | gl | p      |
|----------|-------|----|--------|
| $\chi^2$ | 1227  | 13 | < .001 |
| N        | 26614 |    |        |

## Survey Plots

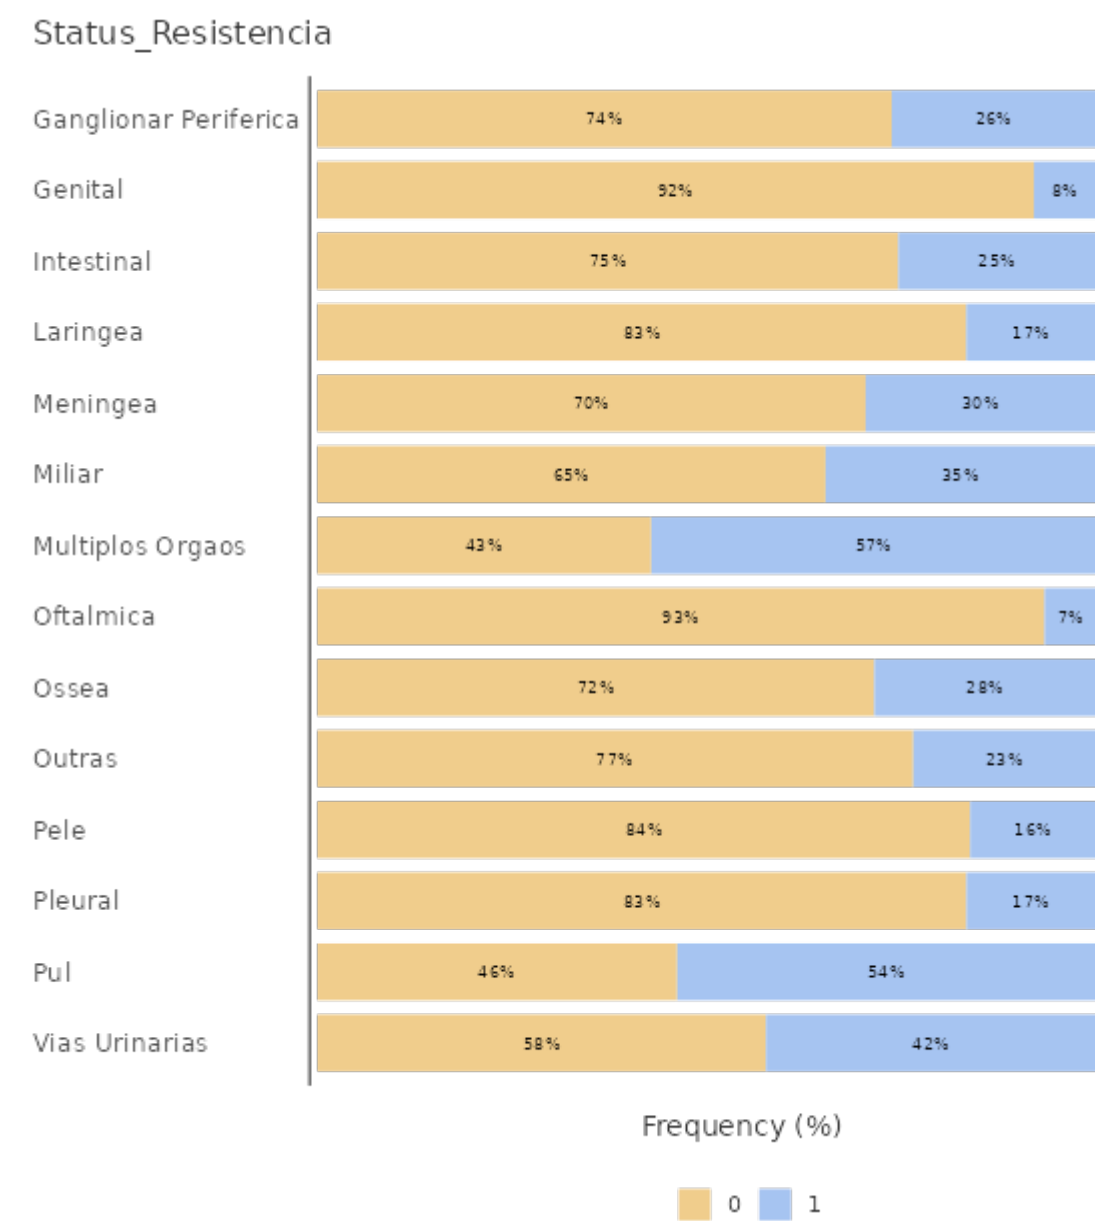

## Tabelas de Contingência

Tabelas de Contingência

| classif |            | Status_Resistencia |        | Total   |
|---------|------------|--------------------|--------|---------|
|         |            | 0                  | 1      |         |
| Dissem  | Observado  | 30                 | 40     | 70      |
|         | % em linha | 42.9 %             | 57.1 % | 100.0 % |
| Ext     | Observado  | 2473               | 678    | 3151    |
|         | % em linha | 78.5 %             | 21.5 % | 100.0 % |
| P+E     | Observado  | 400                | 773    | 1173    |
|         | % em linha | 34.1 %             | 65.9 % | 100.0 % |
| Pul     | Observado  | 10404              | 11816  | 22220   |
|         | % em linha | 46.8 %             | 53.2 % | 100.0 % |
| Total   | Observado  | 13307              | 13307  | 26614   |
|         | % em linha | 50.0 %             | 50.0 % | 100.0 % |

Testes  $\chi^2$

|          | Valor | gl | p      |
|----------|-------|----|--------|
| $\chi^2$ | 1232  | 3  | < .001 |
| N        | 26614 |    |        |

Survey Plots

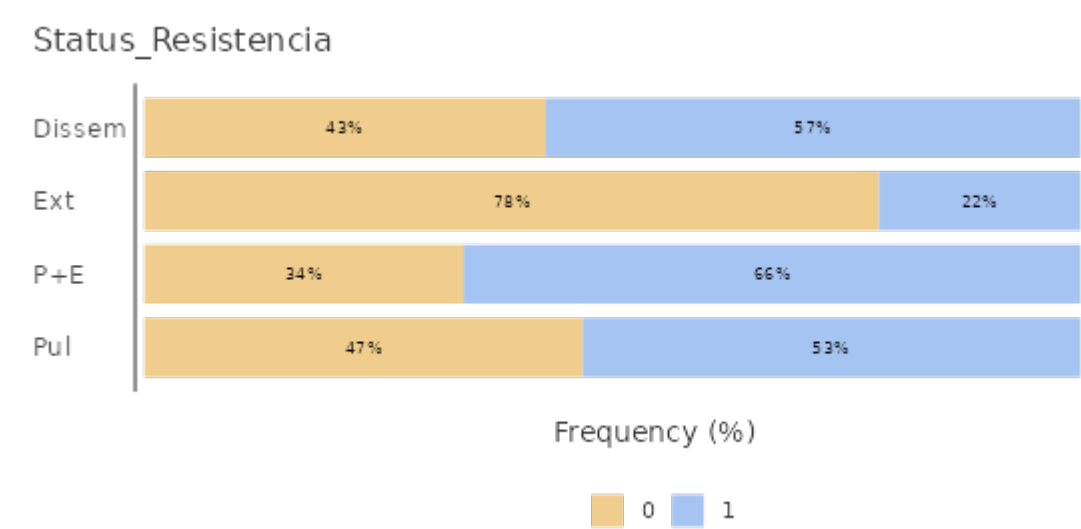

Tabelas de Contingência

Tabelas de Contingência

| bac      |            | Status_Resistencia |        | Total   |
|----------|------------|--------------------|--------|---------|
|          |            | 0                  | 1      |         |
| And      | Observado  | 32                 | 4      | 36      |
|          | % em linha | 88.9 %             | 11.1 % | 100.0 % |
| N/realiz | Observado  | 2503               | 1291   | 3794    |
|          | % em linha | 66.0 %             | 34.0 % | 100.0 % |
| Neg      | Observado  | 3390               | 2668   | 6058    |
|          | % em linha | 56.0 %             | 44.0 % | 100.0 % |
| Pos      | Observado  | 7265               | 9279   | 16544   |
|          | % em linha | 43.9 %             | 56.1 % | 100.0 % |
| Total    | Observado  | 13190              | 13242  | 26432   |
|          | % em linha | 49.9 %             | 50.1 % | 100.0 % |

Testes  $\chi^2$

|          | Valor | gl | p      |
|----------|-------|----|--------|
| $\chi^2$ | 740   | 3  | < .001 |
| N        | 26432 |    |        |

Survey Plots

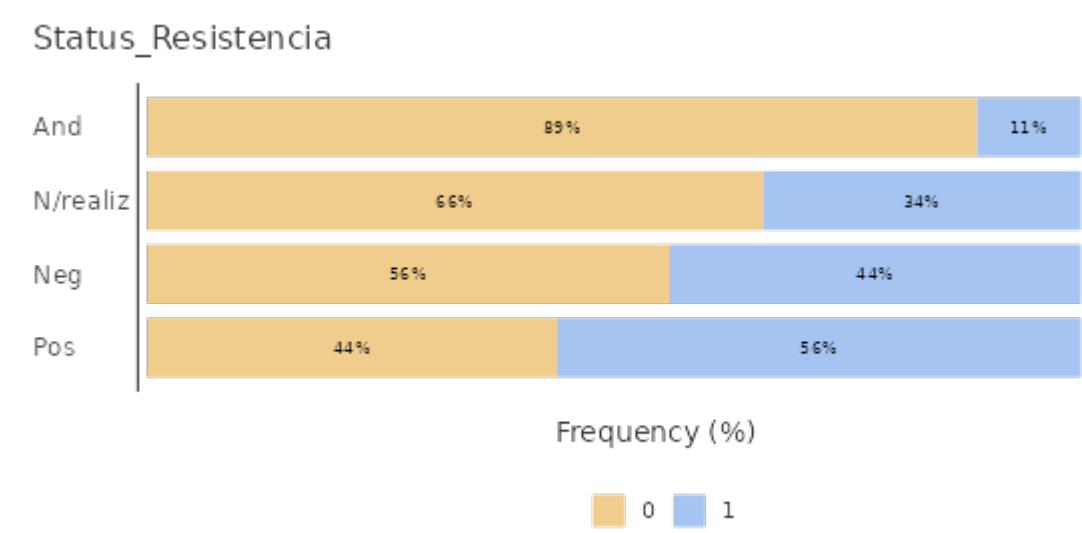

Tabelas de Contingência

Tabelas de Contingência

| instTrat                  |            | Status_Resistencia |        | Total   |
|---------------------------|------------|--------------------|--------|---------|
|                           |            | 0                  | 1      |         |
| Albergue                  | Observado  | 68                 | 266    | 334     |
|                           | % em linha | 20.4 %             | 79.6 % | 100.0 % |
| Asilo                     | Observado  | 20                 | 4      | 24      |
|                           | % em linha | 83.3 %             | 16.7 % | 100.0 % |
| Casa de Apoio/Recuperacao | Observado  | 1                  | 4      | 5       |
|                           | % em linha | 20.0 %             | 80.0 % | 100.0 % |
| Hosp. Psiq.               | Observado  | 20                 | 33     | 53      |
|                           | % em linha | 37.7 %             | 62.3 % | 100.0 % |
| Instit. Penal             | Observado  | 96                 | 496    | 592     |
|                           | % em linha | 16.2 %             | 83.8 % | 100.0 % |
| N                         | Observado  | 12655              | 11518  | 24173   |
|                           | % em linha | 52.4 %             | 47.6 % | 100.0 % |
| Orfanato                  | Observado  | 2                  | 0      | 2       |
|                           | % em linha | 100.0 %            | 0.0 %  | 100.0 % |
| Total                     | Observado  | 12862              | 12321  | 25183   |
|                           | % em linha | 51.1 %             | 48.9 % | 100.0 % |

Testes  $\chi^2$

|                       | Valor | gl | p                   |
|-----------------------|-------|----|---------------------|
| $\chi^2$              | 447   | 6  | < .001              |
| Teste Exato de Fisher |       |    | < .001 <sup>a</sup> |
| N                     | 25183 |    |                     |

<sup>a</sup> Monte Carlo simulation

Survey Plots

## Status\_Resistencia

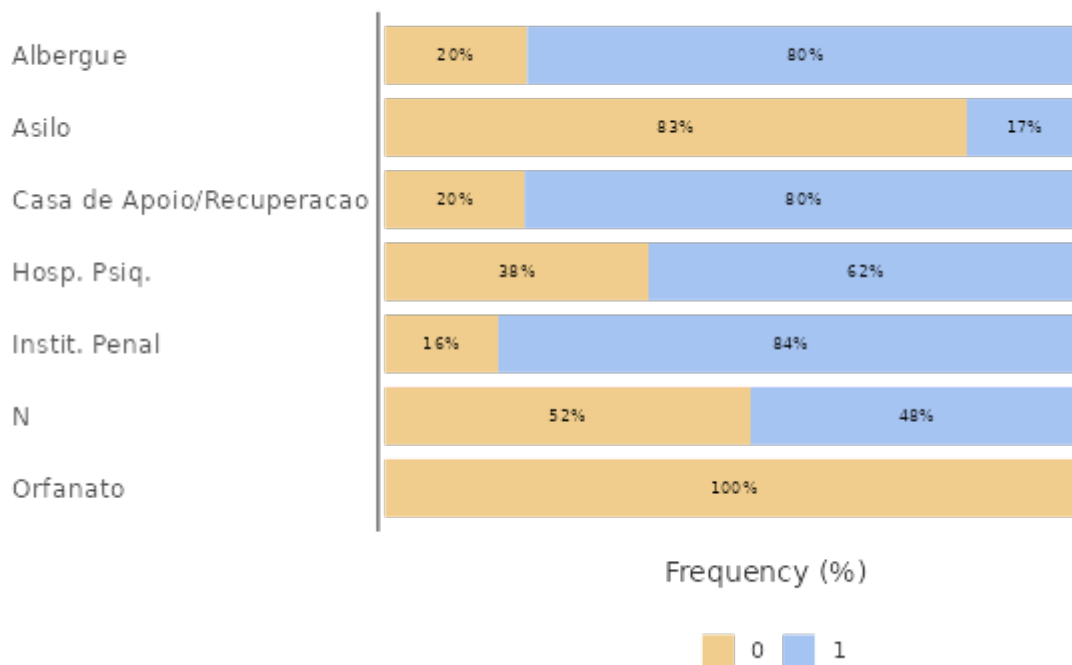

## Tabelas de Contingência

Tabelas de Contingência

|                 |            | Status_Resistencia |        | Total   |
|-----------------|------------|--------------------|--------|---------|
| RX              |            | 0                  | 1      |         |
| N/realiz        | Observado  | 1528               | 1804   | 3332    |
|                 | % em linha | 45.9 %             | 54.1 % | 100.0 % |
| Normal          | Observado  | 1025               | 640    | 1665    |
|                 | % em linha | 61.6 %             | 38.4 % | 100.0 % |
| Outra Patologia | Observado  | 120                | 95     | 215     |
|                 | % em linha | 55.8 %             | 44.2 % | 100.0 % |
| Susp TB         | Observado  | 7879               | 7723   | 15602   |
|                 | % em linha | 50.5 %             | 49.5 % | 100.0 % |
| Susp c/cavid    | Observado  | 2117               | 2407   | 4524    |
|                 | % em linha | 46.8 %             | 53.2 % | 100.0 % |
| Total           | Observado  | 12669              | 12669  | 25338   |
|                 | % em linha | 50.0 %             | 50.0 % | 100.0 % |

Testes  $\chi^2$

|          | Valor | gl | p      |
|----------|-------|----|--------|
| $\chi^2$ | 135   | 4  | < .001 |
| N        | 25338 |    |        |

## Survey Plots

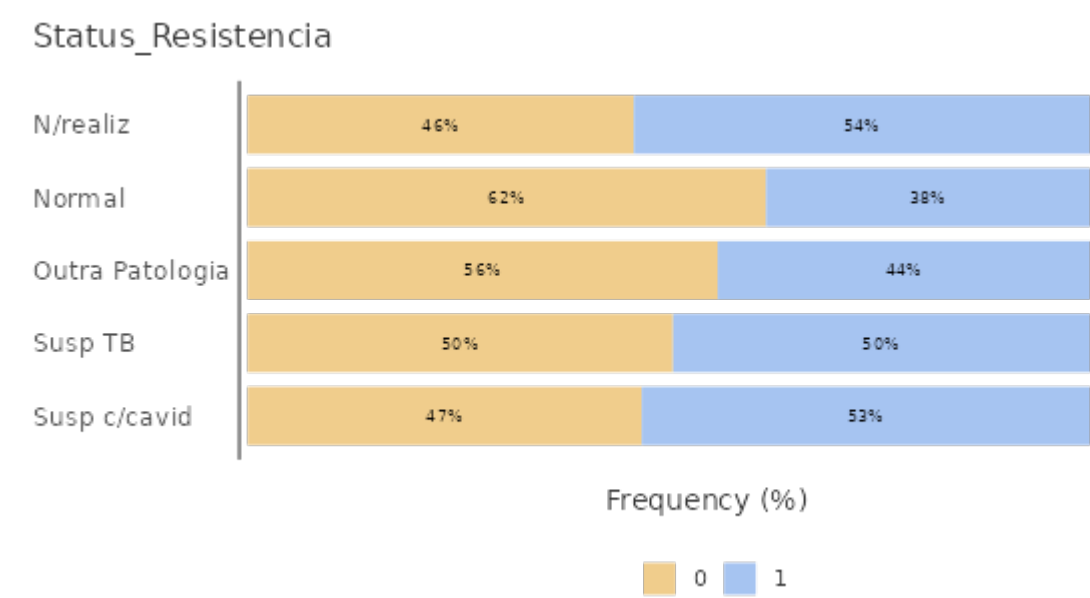

## Tabelas de Contingência

Tabelas de Contingência

|       |            | Status_Resistencia |        |         |
|-------|------------|--------------------|--------|---------|
| aids  |            | 0                  | 1      | Total   |
| N     | Observado  | 12394              | 11279  | 23673   |
|       | % em linha | 52.4 %             | 47.6 % | 100.0 % |
| S     | Observado  | 913                | 2028   | 2941    |
|       | % em linha | 31.0 %             | 69.0 % | 100.0 % |
| Total | Observado  | 13307              | 13307  | 26614   |
|       | % em linha | 50.0 %             | 50.0 % | 100.0 % |

Testes  $\chi^2$

|          | Valor | gl | p      |
|----------|-------|----|--------|
| $\chi^2$ | 475   | 1  | < .001 |
| N        | 26614 |    |        |

## Survey Plots

## Status\_Resistencia

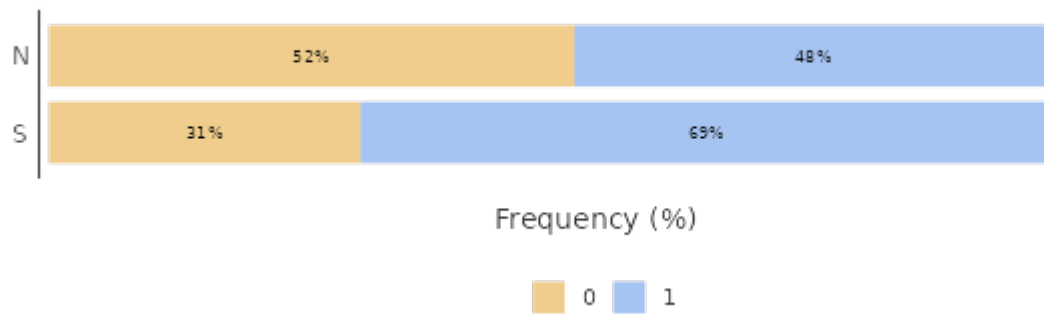

## Tabelas de Contingência

Tabelas de Contingência

|                                 |            | Status_Resistencia |        | Total   |
|---------------------------------|------------|--------------------|--------|---------|
|                                 |            | 0                  | 1      |         |
| Busca Ativa em Instituicao      | Observado  | 172                | 433    | 605     |
|                                 | % em linha | 28.4 %             | 71.6 % | 100.0 % |
| Busca Ativa na Comunidade       | Observado  | 352                | 419    | 771     |
|                                 | % em linha | 45.7 %             | 54.3 % | 100.0 % |
| Demanda Ambulatorial            | Observado  | 6843               | 6395   | 13238   |
|                                 | % em linha | 51.7 %             | 48.3 % | 100.0 % |
| Elucidacao Diagn. em Internacao | Observado  | 2383               | 2540   | 4923    |
|                                 | % em linha | 48.4 %             | 51.6 % | 100.0 % |
| Investigacao de Contatos        | Observado  | 480                | 315    | 795     |
|                                 | % em linha | 60.4 %             | 39.6 % | 100.0 % |
| Urgencia / Emergencia           | Observado  | 2859               | 3071   | 5930    |
|                                 | % em linha | 48.2 %             | 51.8 % | 100.0 % |
| Total                           | Observado  | 13089              | 13173  | 26262   |
|                                 | % em linha | 49.8 %             | 50.2 % | 100.0 % |

Testes  $\chi^2$

|          | Valor | gl | p      |
|----------|-------|----|--------|
| $\chi^2$ | 180   | 5  | < .001 |
| N        | 26262 |    |        |

## Survey Plots



## Status\_Resistencia

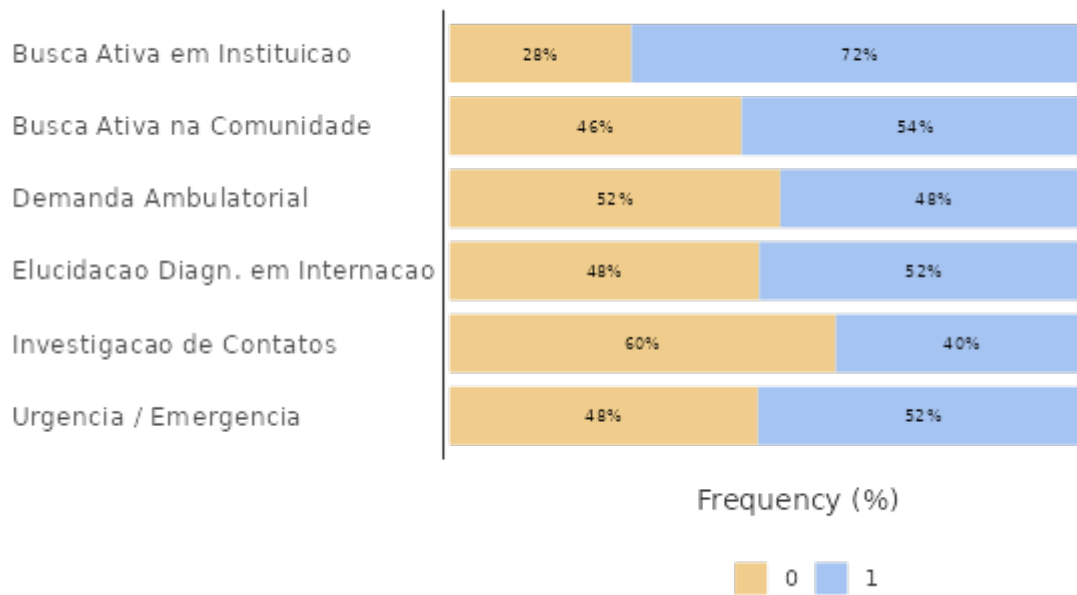

## Tabelas de Contingência

Tabelas de Contingência

|          |            | Status_Resistencia |        |         |
|----------|------------|--------------------|--------|---------|
| hiv      |            | 0                  | 1      | Total   |
| And      | Observado  | 86                 | 54     | 140     |
|          | % em linha | 61.4 %             | 38.6 % | 100.0 % |
| N/realiz | Observado  | 1259               | 884    | 2143    |
|          | % em linha | 58.7 %             | 41.3 % | 100.0 % |
| Neg      | Observado  | 10724              | 10069  | 20793   |
|          | % em linha | 51.6 %             | 48.4 % | 100.0 % |
| Pos      | Observado  | 1004               | 2164   | 3168    |
|          | % em linha | 31.7 %             | 68.3 % | 100.0 % |
| Total    | Observado  | 13073              | 13171  | 26244   |
|          | % em linha | 49.8 %             | 50.2 % | 100.0 % |

Testes  $\chi^2$

|          | Valor | gl | p      |
|----------|-------|----|--------|
| $\chi^2$ | 518   | 3  | < .001 |
| N        | 26244 |    |        |

## Survey Plots

## Status\_Resistencia

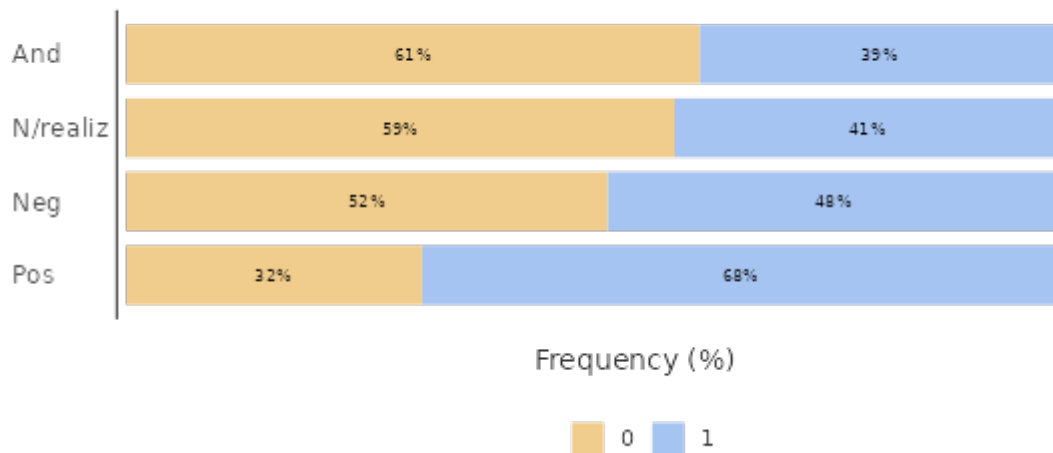

## Tabelas de Contingência

Tabelas de Contingência

|       |            | Status_Resistencia |        |         |
|-------|------------|--------------------|--------|---------|
| sexo  |            | 0                  | 1      | Total   |
| F     | Observado  | 4604               | 3562   | 8166    |
|       | % em linha | 56.4 %             | 43.6 % | 100.0 % |
| M     | Observado  | 8703               | 9745   | 18448   |
|       | % em linha | 47.2 %             | 52.8 % | 100.0 % |
| Total | Observado  | 13307              | 13307  | 26614   |
|       | % em linha | 50.0 %             | 50.0 % | 100.0 % |

Testes  $\chi^2$

|          | Valor | gl | p      |
|----------|-------|----|--------|
| $\chi^2$ | 192   | 1  | < .001 |
| N        | 26614 |    |        |

## Survey Plots

## Status\_Resistencia

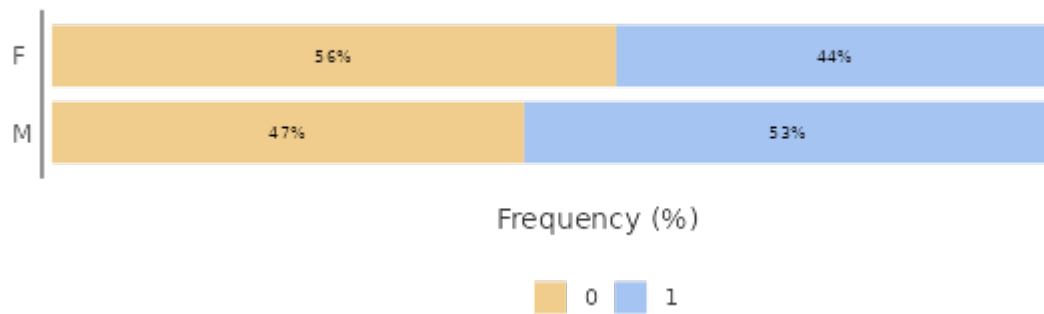

## Tabelas de Contingência

Tabelas de Contingência

|                  |            | Status_Resistencia |        | Total   |
|------------------|------------|--------------------|--------|---------|
|                  |            | 0                  | 1      |         |
| 01_04            | Observado  | 166                | 25     | 191     |
|                  | % em linha | 86.9 %             | 13.1 % | 100.0 % |
| 05_09            | Observado  | 138                | 25     | 163     |
|                  | % em linha | 84.7 %             | 15.3 % | 100.0 % |
| 10_14            | Observado  | 225                | 137    | 362     |
|                  | % em linha | 62.2 %             | 37.8 % | 100.0 % |
| 15_19            | Observado  | 942                | 647    | 1589    |
|                  | % em linha | 59.3 %             | 40.7 % | 100.0 % |
| 20_29            | Observado  | 3187               | 3299   | 6486    |
|                  | % em linha | 49.1 %             | 50.9 % | 100.0 % |
| 30_39            | Observado  | 2761               | 3328   | 6089    |
|                  | % em linha | 45.3 %             | 54.7 % | 100.0 % |
| 40_49            | Observado  | 2512               | 2763   | 5275    |
|                  | % em linha | 47.6 %             | 52.4 % | 100.0 % |
| 50_59            | Observado  | 1855               | 1920   | 3775    |
|                  | % em linha | 49.1 %             | 50.9 % | 100.0 % |
| 60_69            | Observado  | 956                | 806    | 1762    |
|                  | % em linha | 54.3 %             | 45.7 % | 100.0 % |
| 70_79            | Observado  | 376                | 263    | 639     |
|                  | % em linha | 58.8 %             | 41.2 % | 100.0 % |
| Maior de 80 anos | Observado  | 130                | 70     | 200     |
|                  | % em linha | 65.0 %             | 35.0 % | 100.0 % |
| Menor de 1 ano   | Observado  | 59                 | 24     | 83      |
|                  | % em linha | 71.1 %             | 28.9 % | 100.0 % |
| Total            | Observado  | 13307              | 13307  | 26614   |
|                  | % em linha | 50.0 %             | 50.0 % | 100.0 % |

Testes  $\chi^2$

|          | Valor | gl | p      |
|----------|-------|----|--------|
| $\chi^2$ | 392   | 11 | < .001 |
| N        | 26614 |    |        |

Survey Plots

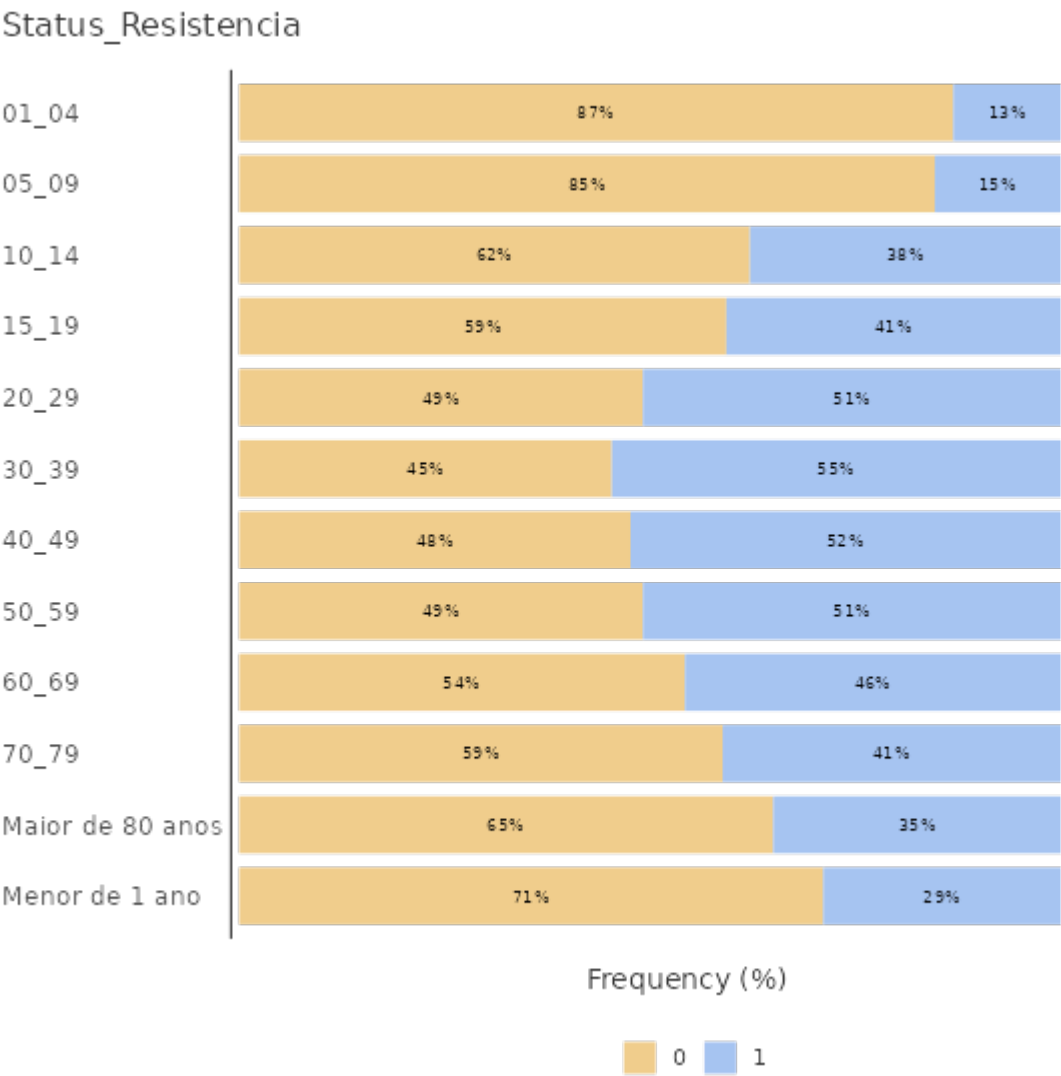

Tabelas de Contingência

Tabelas de Contingência

| ALCOOLISMO |            | Status_Resistencia |        | Total   |
|------------|------------|--------------------|--------|---------|
|            |            | 0                  | 1      |         |
| N          | Observado  | 11477              | 10106  | 21583   |
|            | % em linha | 53.2 %             | 46.8 % | 100.0 % |
| S          | Observado  | 1830               | 3201   | 5031    |
|            | % em linha | 36.4 %             | 63.6 % | 100.0 % |
| Total      | Observado  | 13307              | 13307  | 26614   |
|            | % em linha | 50.0 %             | 50.0 % | 100.0 % |

Testes  $\chi^2$

|          | Valor | gl | p      |
|----------|-------|----|--------|
| $\chi^2$ | 461   | 1  | < .001 |
| N        | 26614 |    |        |

Survey Plots

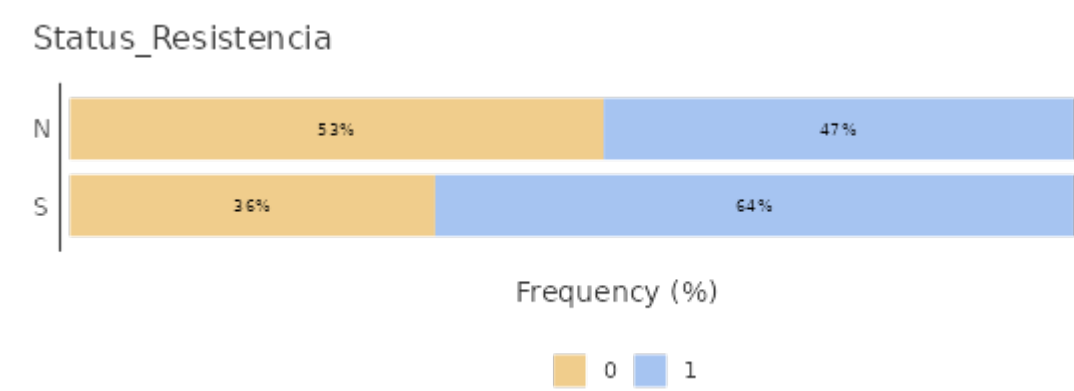

Tabelas de Contingência

Tabelas de Contingência

| HISTOPATOL   |            | Status_Resistencia |        | Total   |
|--------------|------------|--------------------|--------|---------|
|              |            | 0                  | 1      |         |
| BAAR pos     | Observado  | 315                | 263    | 578     |
|              | % em linha | 54.5 %             | 45.5 % | 100.0 % |
| N/realiz     | Observado  | 9468               | 10403  | 19871   |
|              | % em linha | 47.6 %             | 52.4 % | 100.0 % |
| Sugestivo TB | Observado  | 969                | 360    | 1329    |
|              | % em linha | 72.9 %             | 27.1 % | 100.0 % |
| Total        | Observado  | 10752              | 11026  | 21778   |
|              | % em linha | 49.4 %             | 50.6 % | 100.0 % |

Testes  $\chi^2$

|          | Valor | gl | p      |
|----------|-------|----|--------|
| $\chi^2$ | 324   | 2  | < .001 |
| N        | 21778 |    |        |

## Survey Plots

Status\_Resistencia

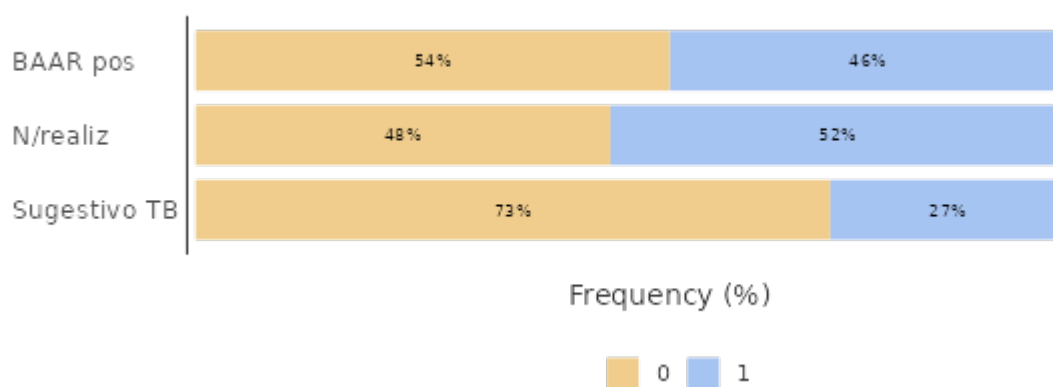

## Referências

**[1]** The jamovi project (2022). *jamovi*. (Version 2.3) [Computer Software]. Retrieved from <https://www.jamovi.org>.

**[2]** R Core Team (2021). *R: A Language and environment for statistical computing*. (Version 4.1) [Computer software]. Retrieved from <https://cran.r-project.org>. (R packages retrieved from MRAN snapshot 2022-01-01).
